# Supplementary figures and images for: A phase II feasibility study of carboplatin and nab‐paclitaxel for advanced non‐small cell lung cancer patients with interstitial lung disease (YLOG0114)
Source: PubMed Central journal article supplement — Thorac Cancer. 2022 Mar 23;13(9):1267–75. doi: 10.1111/1759-7714.14376 (PMC9058300; doi:10.1111/1759-7714.14376), 2022-03-23

Fig.S1

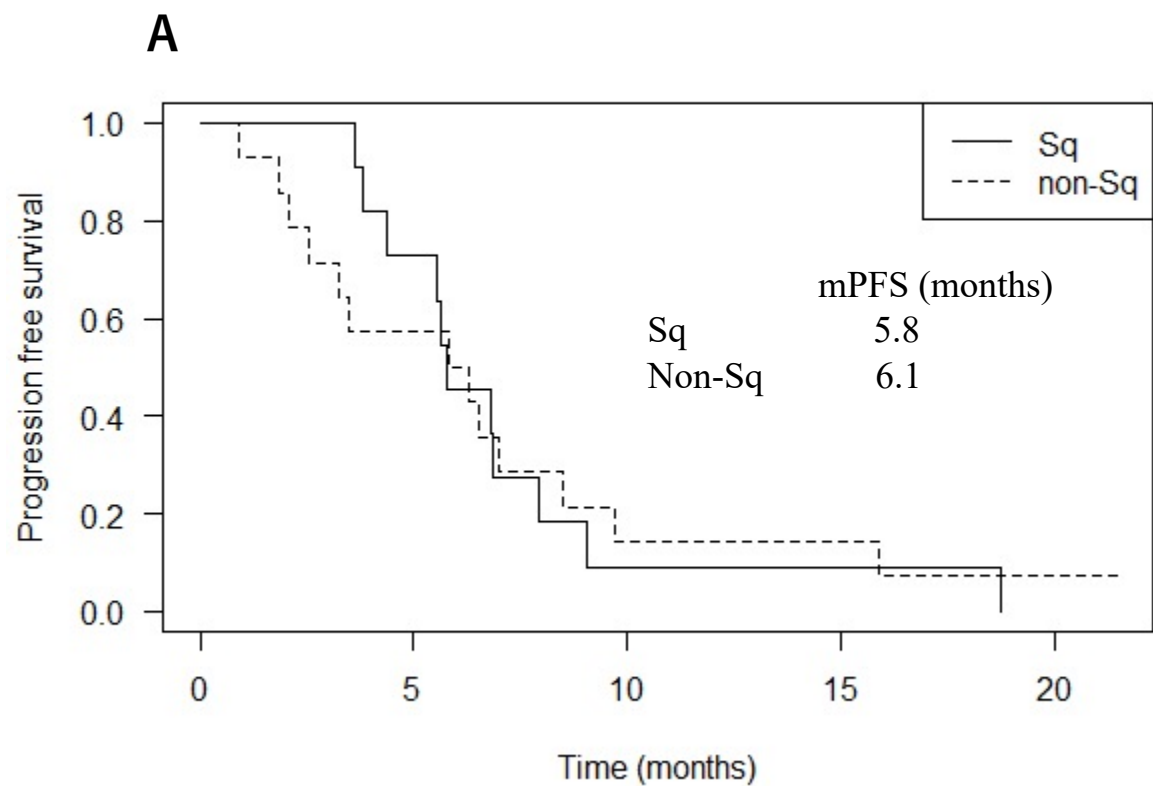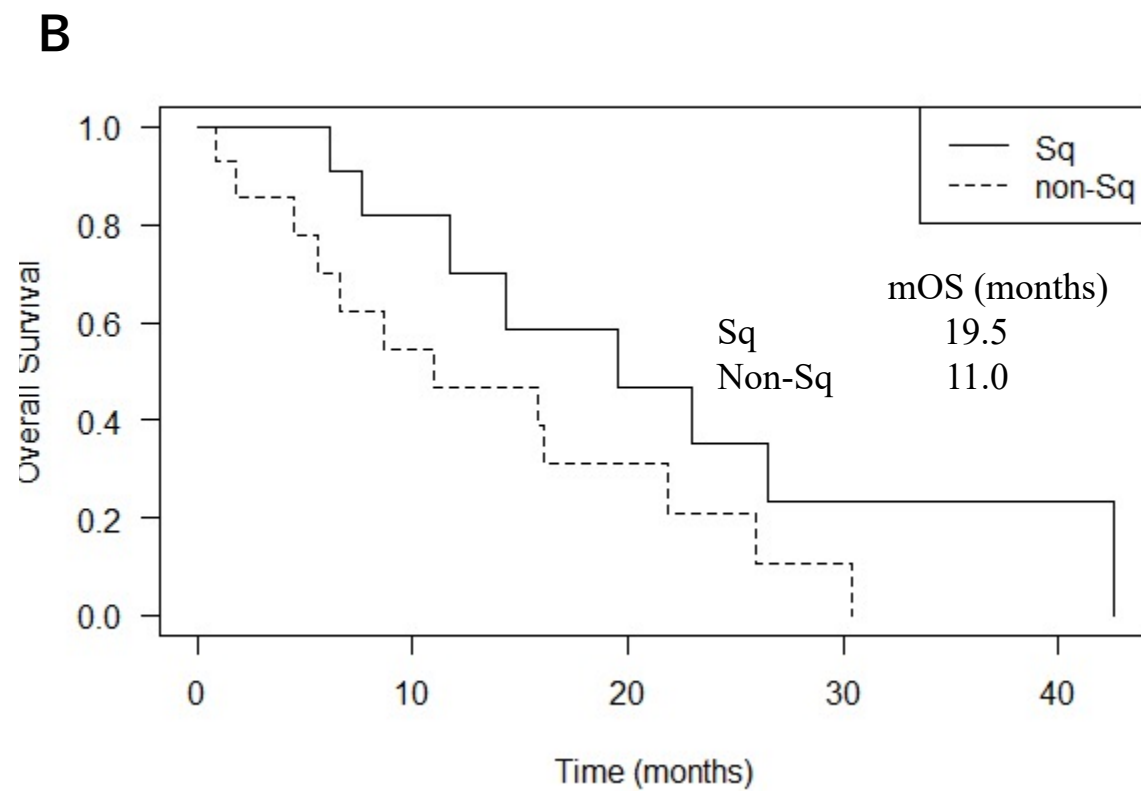

Supplement: TCA-13-1267-s001.pdf [file TCA-13-1267-s001.pdf]
